# Supplementary material for: Effects of bright light therapy for depression during pregnancy: a randomised, double-blind controlled trial
Source: PubMed Central journal article supplement (PMC7594358; doi:10.1136/bmjopen-2020-038030), 2020-10-28
Supplement: bmjopen-2020-038030supp001.pdf [file bmjopen-2020-038030supp001.pdf]

**Supplementary Table 1.** Photobiological characterizations of light therapy in both treatment arms.

|                                                             | <b>BLT</b> | <b>DRLT</b> |
|-------------------------------------------------------------|------------|-------------|
| Cyanopic irradiance ( $\mu\text{W} \cdot \text{cm}^{-2}$ )  | 578.7      | 2.24        |
| Melanopic irradiance ( $\mu\text{W} \cdot \text{cm}^{-2}$ ) | 891        | 5.53        |
| Chloropic irradiance ( $\mu\text{W} \cdot \text{cm}^{-2}$ ) | 1032.3     | 7.23        |
| Erythroic irradiance ( $\mu\text{W} \cdot \text{cm}^{-2}$ ) | 1212.3     | 11.37       |
| Rhodopic irradiance ( $\mu\text{W} \cdot \text{cm}^{-2}$ )  | 16.61      | 16.61       |

BLT = bright light therapy; DRLT = dim red light therapy

**Supplementary Table 2.** Observed median SIGH-SAD, HAM-D and EPDS scores with ranges and number of participants over the course of the study for both treatment arms.

| <b>Measure</b>              | <b>T0</b>        | <b>T0+1</b>     | <b>T0+2</b>   | <b>T0+3</b>   | <b>T0+4</b>   | <b>T0+5</b>     | <b>T1</b>       | <b>T2</b>       | <b>T3</b>      | <b>P1</b>    |
|-----------------------------|------------------|-----------------|---------------|---------------|---------------|-----------------|-----------------|-----------------|----------------|--------------|
| <b>SIGH-SAD</b>             |                  |                 |               |               |               |                 |                 |                 |                |              |
| <b>BLT (mdn, range, N)</b>  | 27 (14-44; 33)   | 16.5 (1-33; 30) | 16 (2-43; 29) | 15 (0-41; 25) | 18 (0-32; 25) | 17.5 (1-37; 24) | 15.5 (0-29; 26) | 13 (1-26; 25)   | 11 (0-29; 17)  | 8 (1-23; 20) |
| <b>DRLT (mdn, range, N)</b> | 26.5 (13-42; 34) | 19 (8-33; 31)   | 17 (2-35; 27) | 18 (4-30; 29) | 15 (3-28; 24) | 16 (2-31; 25)   | 13 (2-34; 25)   | 11.5 (1-26; 24) | 9.5 (1-31; 14) | 8 (0-28; 25) |
| <b>HAM-D</b>                |                  |                 |               |               |               |                 |                 |                 |                |              |
| <b>BLT (mdn, range, N)</b>  | 16 (7-29; 33)    | 9 (0-25; 30)    | 9 (1-30; 29)  | 8 (0-28; 25)  | 10 (0-22; 25) | 10 (0-21; 24)   | 7.5 (0-20; 26)  | 8 (0-17; 25)    | 5 (0-16; 17)   | 3 (0-11; 20) |
| <b>DRLT (mdn, range, N)</b> | 18 (4-29; 34)    | 10 (3-20; 31)   | 9 (1-22; 27)  | 9 (2-20; 29)  | 8 (0-18; 24)  | 8 (1-20; 25)    | 6 (1-18; 25)    | 4.5 (0-20; 24)  | 4 (0-15; 14)   | 4 (0-19; 25) |
| <b>EPDS</b>                 |                  |                 |               |               |               |                 |                 |                 |                |              |
| <b>BLT (mdn, range, N)</b>  | 16 (7-25; 31)    | 11 (3-23; 26)   | 11 (0-23; 26) | 10 (0-19; 21) | 8 (0-25; 23)  | 7 (0-18; 23)    | 9.5 (1-18; 26)  | 8.5 (0-15; 18)  | 8.5 (1-24; 16) | 7 (0-13; 22) |

|                             |               |               |               |                 |               |               |                |              |              |              |
|-----------------------------|---------------|---------------|---------------|-----------------|---------------|---------------|----------------|--------------|--------------|--------------|
| <b>DRLT (mdn, range, N)</b> | 16 (3-25; 34) | 12 (6-19; 28) | 12 (3-20; 25) | 11.5 (3-21; 24) | 10 (1-18; 24) | 10 (2-19; 23) | 6.5 (1-22; 24) | 6 (0-21; 23) | 4 (1-10; 12) | 7 (0-18; 26) |
|-----------------------------|---------------|---------------|---------------|-----------------|---------------|---------------|----------------|--------------|--------------|--------------|

BLT = bright light therapy; DRLT = dim red light therapy; SIGH- SAD = Structured Interview Guide for the Hamilton Depression Scale – Seasonal Affective Disorder version; HAM-D = Hamilton Rating Scale for Depression; EPDS = Edinburgh Postnatal Depression Scale; T0 = baseline, before treatment; T0+1, T0+2 ... T0+5 = weeks during intervention period; T1 = end of treatment; T2 = 3 weeks after end of treatment; T3 = 10 weeks after end of treatment; P1 = 2 months postpartum; mdn = median

**Supplementary Table 3.** Effects of allocation on the course of depressive symptoms through the intervention period and follow-up (until two months postpartum): sensitivity analyses.

|                                                                 | <b>β (95% CI) of intervention*</b> | <b>β (95% CI) of follow-up**</b> |
|-----------------------------------------------------------------|------------------------------------|----------------------------------|
| <b>Adjusted analysis<sup>a</sup></b>                            |                                    |                                  |
| <b>SIGH-SAD</b>                                                 | -0.27 (-1.70, 1.15)                | -0.24 (-1.68, 1.20)              |
| <b>HAM-D</b>                                                    | 0.10 (-0.51, 0.72)                 | 0.13 (-0.49, 0.75)               |
| <b>EPDS</b>                                                     | 0.27 (-0.36, 0.90)                 | 0.25 (-0.38, 0.89)               |
| <b>Data imputation<sup>b</sup></b>                              |                                    |                                  |
| <b>SIGH-SAD</b>                                                 | -0.45 (-1.44, 0.53)                | -0.08 (-0.63, 0.46)              |
| <b>HAM-D</b>                                                    | -0.09 (-0.63, 0.44)                | 0.06 (-0.25, 0.37)               |
| <b>EPDS</b>                                                     | 0.19 (-0.30, 0.68)                 | 0.04 (-0.24, 0.32)               |
| <b>Post-hoc analysis: high treatment compliance<sup>c</sup></b> |                                    |                                  |
| <b>SIGH-SAD</b>                                                 | -0.40 (-1.36, 0.55)                | -0.32 (-0.88, 0.24)              |
| <b>HAM-D</b>                                                    | -0.12 (-0.79, 0.54)                | -0.06 (-0.43, 0.31)              |
| <b>EPDS</b>                                                     | 0.03 (-0.58, 0.65)                 | -0.05 (-0.40, 0.30)              |

---

**Post-hoc analysis: high symptom severity<sup>d</sup>**

|                 |                     |                     |
|-----------------|---------------------|---------------------|
| <b>SIGH-SAD</b> | -0.84 (-2.33, 0.65) | -0.20 (-1.14, 0.75) |
| <b>HAM-D</b>    | -0.16 (-1.12, 0.87) | 0.13 (-0.48, 0.73)  |
| <b>EPDS</b>     | -0.05 (-0.92, 0.82) | 0.20 (-0.33, 0.74)  |

---

\* From start of study until end of treatment; \*\* From start of study until follow-up 2 months postpartum; <sup>a</sup> Propensity score composed of psychiatric history, ethnicity, level of education, an unplanned pregnancy, maternal age, parity, gestational age, duration of actual depression and other psychiatric or psychotherapeutic treatment interventions; <sup>b</sup> Last observation carried forward; <sup>c</sup> <7 missed treatments; <sup>d</sup> Based on median split baseline SIGH-SAD scores
